# Supplementary material for: Health Service Utilization in Hong Kong During the COVID-19 Pandemic – A Cross-sectional Public Survey
Source: PubMed Central journal article supplement (PMC9309937; doi:10.34172/ijhpm.2020.183), 2020-10-19
Supplement: ijhpm-11-508-s002.pdf [file ijhpm-11-508-s002.pdf]

## Supplementary file 2. Questions From Questionnaire Used in the Current Study

### 1. Gender

1. Male            2. Female

### 2. What is your age?

1. 18-19   2. 20-24   3. 25-29   4. 30-34  
 5. 35-39   6. 40-44   7. 45-49   8. 50-54  
 9. 55-59   10. 60-64   11. 65-69   12. ≥70  
 999. Refuse to answer

### 3. Do you agree that the COVID-19 virus testing should be available for everyone who is worried of getting the disease? (read option)

1. Totally disagree   2. Disagree   3. Neutral   4. Agree  
 5. Totally agree   888. Don't know   999. Refuse to answer

### 4. Have you been diagnosed with COVID-19?

- 1) No   2) Yes   3) Don't know   4) 999. Refuse to answer

### 5. Has anyone in close proximity to you been diagnosed with COVID-19? (The close proximity is defined as living in the same household, living in the same building does not count)

- 1) No   2) Yes   3) Don't know   4) 999. Refuse to answer

| <i>Here I will ask few questions about COVID-19. Please give a score from 1-5 in the following questions (Please explain what score 1 and 5 mean when asking the question):</i> |                             |   |   |   |   |   |                         |     | Don't know | Refuse |
|---------------------------------------------------------------------------------------------------------------------------------------------------------------------------------|-----------------------------|---|---|---|---|---|-------------------------|-----|------------|--------|
| <b>6. The chance of being infected by COVID-19 this year is very high (If already 4a answer yes, code=6)?</b>                                                                   | <i>Totally disagree</i>     | 1 | 2 | 3 | 4 | 5 | <i>Totally agree</i>    | 888 | 999        |        |
| <b>7. How much has COVID-19 impacted your health ?</b>                                                                                                                          | <i>No impact at all</i>     | 1 | 2 | 3 | 4 | 5 | <i>Very high impact</i> | 888 | 999        |        |
| <b>8. How much has COVID-19 impacted your mental ?</b>                                                                                                                          | <i>No impact at all</i>     | 1 | 2 | 3 | 4 | 5 | <i>Very high impact</i> | 888 | 999        |        |
| <b>9. Do you have sufficient knowledge to manage the risks to health and personal safety during the COVID-19 outbreak?</b>                                                      | <i>Totally insufficient</i> | 1 | 2 | 3 | 4 | 5 | <i>Very sufficient</i>  | 888 | 999        |        |

### 10. Have you used more or less the health services during COVID-19 epidemic (read each option below)

- i. Private doctor  
 1. more likely   2. same   3. less likely   888. Don't know   999. Refuse
- ii. Public government clinic

- |                                                         |                |         |                |                 |             |
|---------------------------------------------------------|----------------|---------|----------------|-----------------|-------------|
|                                                         | 1. more likely | 2. same | 3. less likely | 888. Don't know | 999. Refuse |
| iii. A&E                                                | 1. more likely | 2. same | 3. less likely | 888. Don't know | 999. Refuse |
| iv. Admission to public hospital (if advised by doctor) | 1. more likely | 2. same | 3. less likely | 888. Don't know | 999. Refuse |
| v. Admission to private hospital (if advised)           | 1. more likely | 2. same | 3. less likely | 888. Don't know | 999. Refuse |

**11. Since January, have you avoided going to a doctor because of COVID-19?**

- |      |       |                |                      |
|------|-------|----------------|----------------------|
| 1.No | 2.Yes | 888.Don't know | 999.Refuse to answer |
|------|-------|----------------|----------------------|

**12. Do you have any form of chronic disease?**

- |       |        |                |                      |
|-------|--------|----------------|----------------------|
| 1. No | 2. Yes | 888.Don't know | 999.Refuse to answer |
|-------|--------|----------------|----------------------|

**13. What is your marital status?**

- |                  |                |                      |             |
|------------------|----------------|----------------------|-------------|
| 1. Never married | 2. Now married | 3. Widowed           | 4. Divorced |
| 5. Separated     | 888.Don't know | 999.Refuse to answer |             |

**14. What is your highest education level obtained?**

- |                                   |                                               |                       |
|-----------------------------------|-----------------------------------------------|-----------------------|
| 1. No schooling/pre-primary       | 2. Primary                                    | 3. Lower secondary    |
| 4. Form 5 graduate                | 5. Upper secondary/graduated secondary school |                       |
| 6. Diploma/certificate            | 7. Higher diploma                             | 8. Associate's degree |
| 9. Bachelor's Degree              | 10. Master's or above                         |                       |
| 11. Others (please specify) _____ | 888.Don't know                                | 999.Refuse to answer  |

**15. What is your occupation?**

- |                                               |                                           |                                   |
|-----------------------------------------------|-------------------------------------------|-----------------------------------|
| 1. Managers and administrators                | 2. Professionals                          | 3. Associate professionals        |
| 4. Clerks                                     | 5. Service workers and shop sales workers | 6. Craft and related workers      |
| 7. Plant and machine operators and assemblers | 8. Elementary occupations                 |                                   |
| 9. Skilled agricultural and fishery workers   | 10. Housewives                            | 11. Student                       |
| 12. Retired                                   | 13. Unemployed                            | 14. Others (please specify) _____ |
| 888.Don't know                                | 999.Refuse to answer                      |                                   |

**16. Have you received a Flu vaccine within the past 12 months?**

- |                |       |                   |
|----------------|-------|-------------------|
| 1 No           | 2 Yes | 3 Cannot remember |
| 888 Don't know |       | 999 Refuse        |

**17. What is your religious affiliation ? (Don't need to read out, can only choose 1)**

- |                        |                 |                                             |             |
|------------------------|-----------------|---------------------------------------------|-------------|
| 1. No religious belief | 2. Christianity | 3. Catholicism                              | 4. Buddhism |
| 5. Taoism              | 6. Islam        | 7. Worship Chinese Gods \ ancestors at home |             |
| 8. Others: _____       | 888.Don't know  | 999.Refuse to answer                        |             |

**18. What type of housing do you live in?**

- |                                   |                                              |                       |
|-----------------------------------|----------------------------------------------|-----------------------|
| 1. Public housing                 | 2. House Ownership Scheme                    | 3. Private estates    |
| 4. Wooden house/temporary shelter | 5. Private house (village house or mansions) |                       |
| 6. Sublet rooms                   | 7. Cubicle or bed-space                      | 888. Don't know       |
| 8. Others (please specify) _____  |                                              | 999. Refuse to answer |

**19. Including you, are there any member in your household who is under 15 years old or older than 59 years old?**

1. No                      2. Yes                      888. Don't know                      999. Refuse to answer

**20. What is your monthly household income (HKD)?**

- |                 |                 |                       |                 |     |                 |     |                 |
|-----------------|-----------------|-----------------------|-----------------|-----|-----------------|-----|-----------------|
| 1.              | < 2,000         | 2.                    | 2,000 - 3,999   | 3.  | 4,000 - 5,999   | 4.  | 6,000 - 7,999   |
| 5.              | 8,000 - 9,999   | 6.                    | 10,000 - 14,999 | 7.  | 15,000 - 19,999 | 8.  | 20,000 - 24,999 |
| 9.              | 25,000 - 29,999 | 10.                   | 30,000 - 39,999 | 11. | 40,000 - 59,999 | 12. | ≥ 60,000        |
| 888. Don't know |                 | 999. Refuse to answer |                 |     |                 |     |                 |

**21. Which district do you live in?**

- |     |                   |     |              |                 |              |                       |              |
|-----|-------------------|-----|--------------|-----------------|--------------|-----------------------|--------------|
| 1.  | Central & Western | 2.  | Wan Chai     | 3.              | Eastern      | 4.                    | Southern     |
| 5.  | YauTsimMong       | 6.  | Sham Shui Po | 7.              | Kowloon City | 8.                    | Wong Tai Sin |
| 9.  | Kwun Tong         | 10. | KwaiTsing    | 11.             | Tsuen Wan    | 12.                   | TuenMun      |
| 13. | Yuen Long         | 14. | North        | 15.             | Tai Po       | 16.                   | Sha Tin      |
| 17. | Sai Kung          | 18. | Islands      | 888. Don't know |              | 999. Refuse to answer |              |
